# Supplementary material
Source: Springer Nature journal article supplement (https://www.springermedizin.de/resource/supplementary/12968_2013_3937_MOESM1_ESM.pdf/9584924)

Anatomical Image

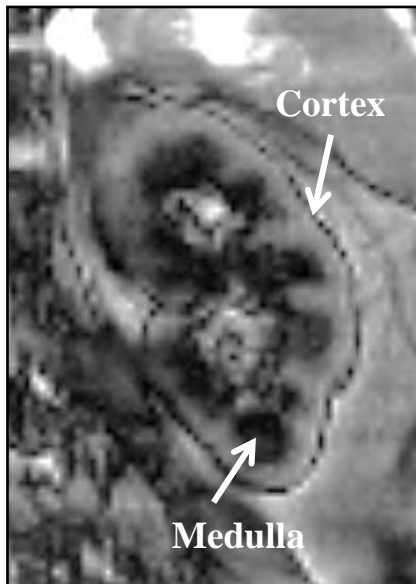

Furosemide-naive patient

Pre-Furosemide BOLD

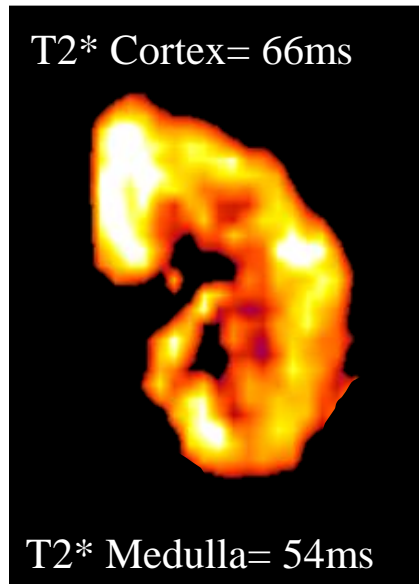

Post-Furosemide BOLD

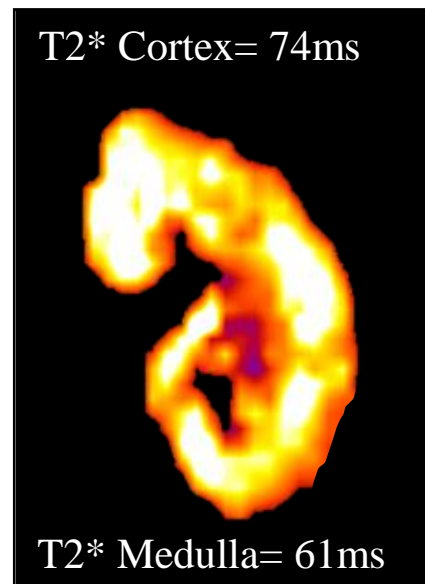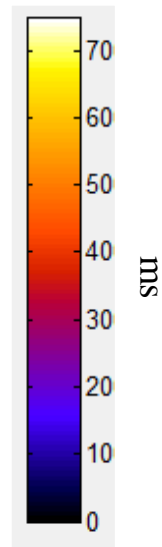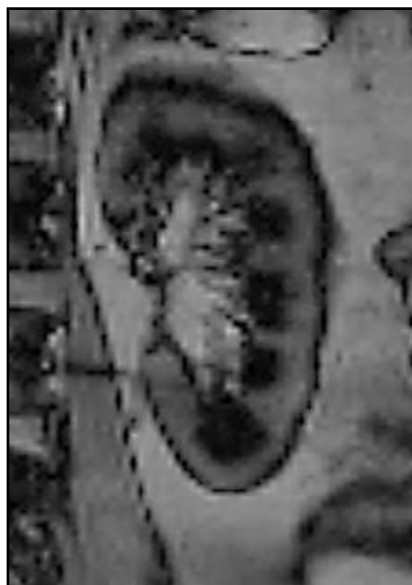

Patient chronically receiving furosemide 40mg daily

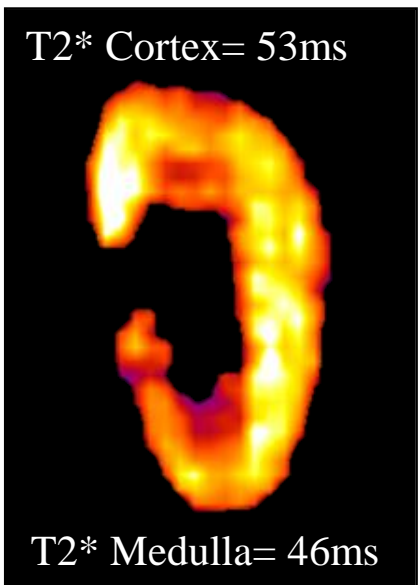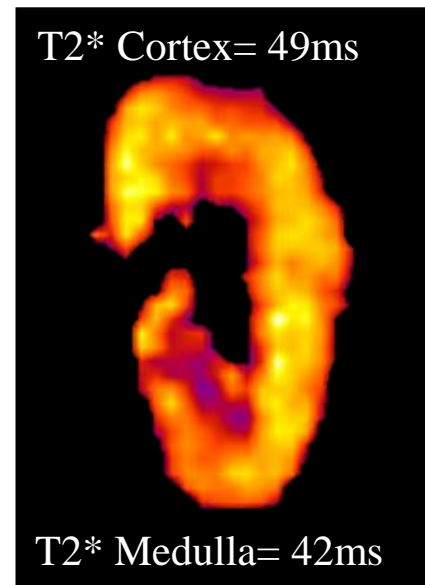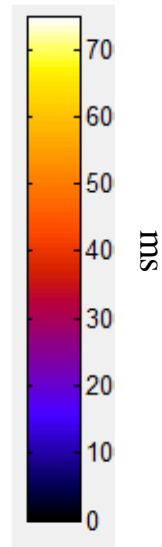

Supplement: MOESM1 [file 9584924]
